# Supplementary material for: Visible to near-infrared light harvesting in Ag2S nanoparticles/ZnO nanowire array photoanodes
Source: Royal Society of Chemistry journal article supplement (doi:10.1039/c2nr11705c), 2012-01-01
Supplement: c2nr11705c.pdf [file c2nr11705c.pdf]

## Supplementary Information

### Visible to Near-Infrared Light Harvesting in Ag<sub>2</sub>S Nanoparticles/ZnO Nanowire Array Photoanodes

Jih-Jen Wu,<sup>a,b,\*</sup> Ru-Chun Chang,<sup>a</sup> Dian-Wei Chen<sup>a</sup> and Chun-Te Wu<sup>a</sup>

<sup>a</sup>Department of Chemical Engineering, National Cheng Kung University, Tainan 701, Taiwan

<sup>b</sup>Research Center for Energy Technology and Strategy, National Cheng Kung University, Tainan 701, Taiwan

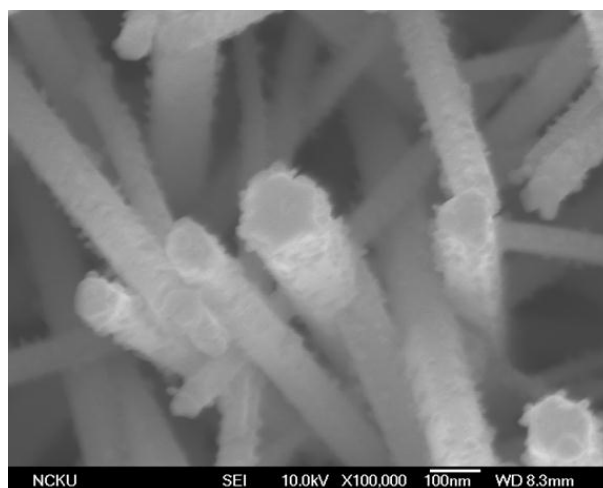

**Fig. S1** SEM image of NPs formed on ZnO NW array in aqueous solution of thiourea and AgNO<sub>3</sub> at 65°C without ultrasound irradiation (0W-30).

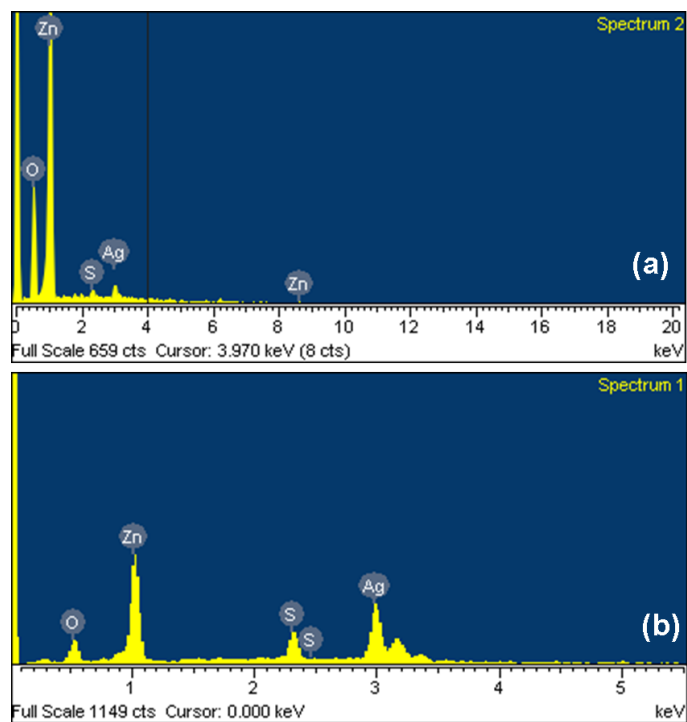

**Fig. S2** EDS spectra of (a) 0W-30 and (b) 4W-30. The ratios of Ag:S are 1.35:1 and 2:1 in (a) and (b), respectively.

### Sonochemical synthesis of the Ag<sub>2</sub>S NPs on the ZnO film

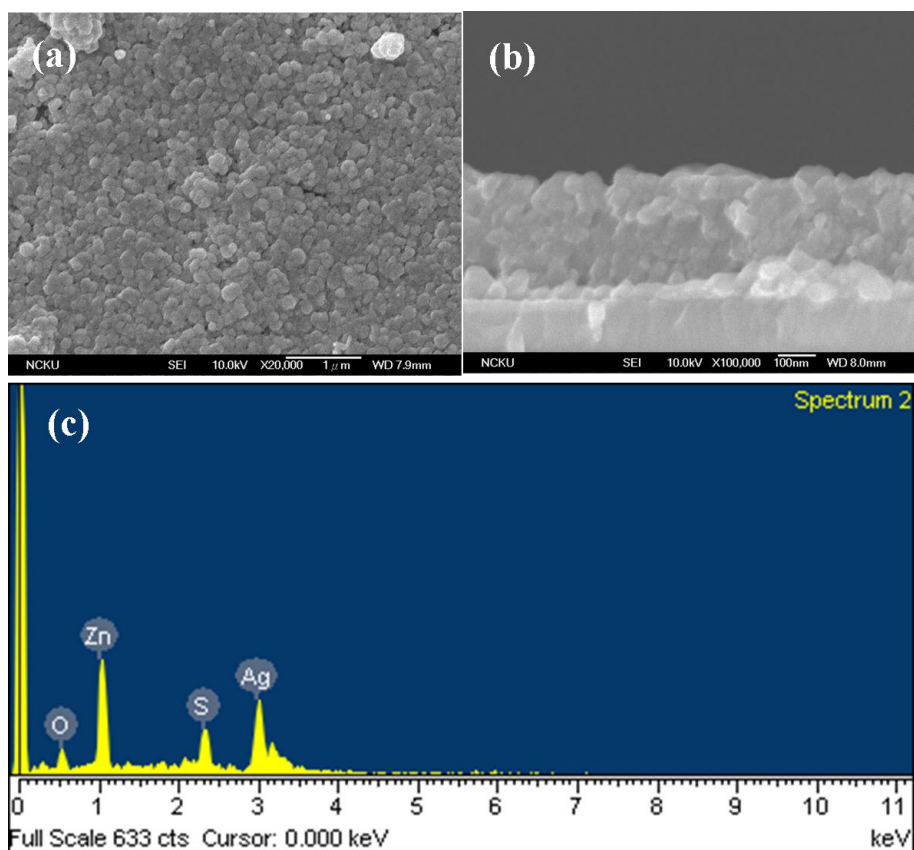

**Fig. S3** (a) Top- and (b) cross-sectional SEM images of Ag<sub>2</sub>S NPs formed on ZnO film by an ultrasound irradiation power of 12 W for 30 min. (c) EDS spectrum of Ag<sub>2</sub>S NP/ZnO Film. The ratio of Ag:S is 2:1 in (c).

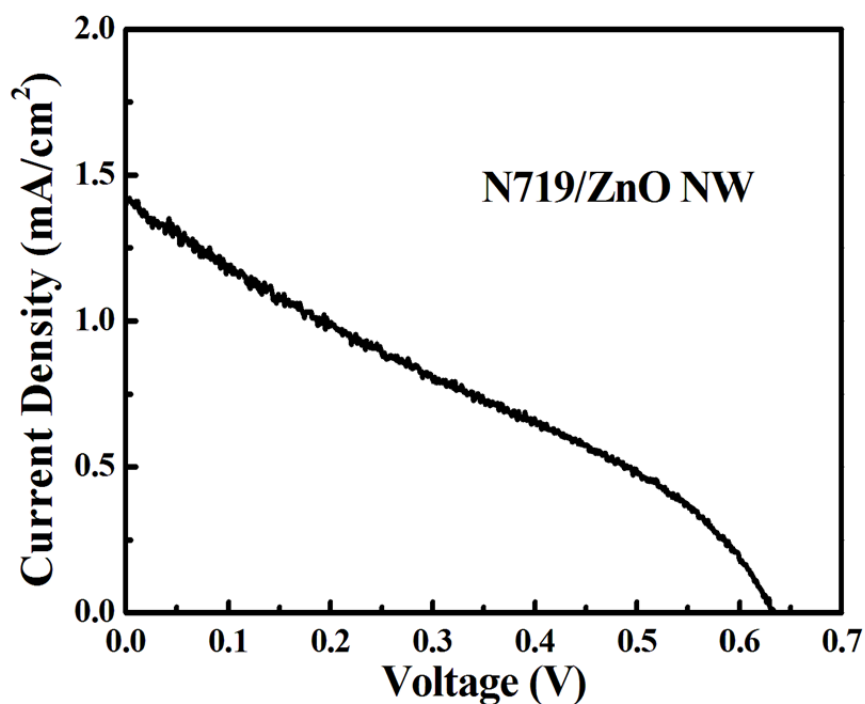

**Fig. S4** J- V curve of N719-sensitized ZnO NW.  $J_{sc}$ ,  $V_{oc}$ , FF and  $\eta$  of the cell are 1.43 mAcm<sup>-2</sup>, 0.63 V, 0.30 and 0.27%, respectively. Dye adsorption was carried out by immersion  $\sim 3$   $\mu$ m-thick ZnO NW array in a 0.1 mM ethanolic solution of N719 dye (RuL<sub>2</sub>(NCS)<sub>2</sub>:2TBA; L = 2,2'-bipyridyl-4,4'-dicarboxylic acid and TBA = tetrabutylammonium, Solaronix SA) at 70°C for 12 h. The sensitized electrode and platinized FTO counter electrodes were sandwiched together with 25  $\mu$ m thick hot-melt spacers. The liquid electrolyte solution, composed of 0.1 M LiI (ProChem), 50 mM I<sub>2</sub>, 0.5 M 4-tertbutylpyridine (Aldrich) and 0.6 M 1-propyl-2,3-dimethylimidazolium (Solaronix SA) in 3-methoxypropionitrile (Fluka), was introduced between the photoanode and counter electrode by capillary action.
